# Supplementary material for: CO2 and temperature decoupling at the million-year scale during the Cretaceous Greenhouse
Source: PubMed Central journal article supplement (PMC5569102; doi:10.1038/s41598-017-08234-0), 2017-08-23
Supplement: 41598_2017_8234_MOESM1_ESM.pdf [file 41598_2017_8234_MOESM1_ESM.pdf]

## Supplementary information materials for

# CO<sub>2</sub> and temperature decoupling at the million-year scale during the Cretaceous Greenhouse

Abel Barral, Bernard Gomez, François Fourel, Véronique Daviero-Gomez and Christophe Lécuyer

**Figure S1.** Geographical map of the eleven localities corresponding to the twelve Cretaceous stages from which *Frenelopsis* samples were studied (original maps from d-maps.com; Europe map: [http://d-maps.com/carte.php?num\\_car=30075&lang=es](http://d-maps.com/carte.php?num_car=30075&lang=es); Belgian regions: [http://d-maps.com/carte.php?num\\_car=17839&lang=es](http://d-maps.com/carte.php?num_car=17839&lang=es); French regions: [http://d-maps.com/carte.php?num\\_car=18001&lang=es](http://d-maps.com/carte.php?num_car=18001&lang=es); Spanish regions: [http://d-maps.com/carte.php?num\\_car=18017&lang=es](http://d-maps.com/carte.php?num_car=18017&lang=es)).

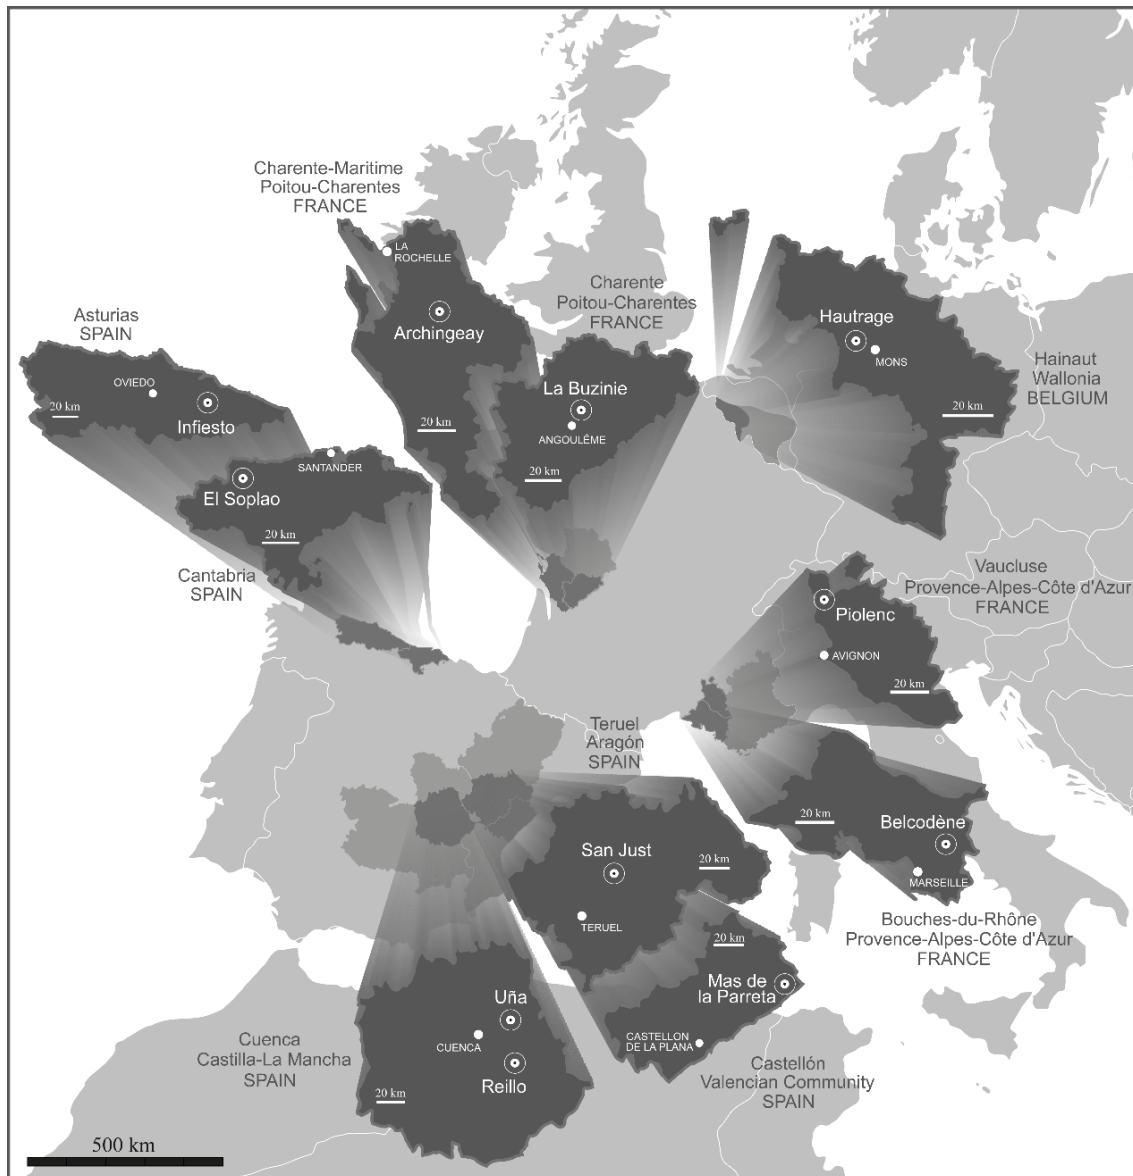

**Table S1.** Geographical, geological and palaeoenvironmental settings of the localities from which *Frenelopsis* samples were studied.

| Locality          | Area              | Country | Stratigraphy               | Age                                         | Bed     | Lithology                                          | Paleoenvironment                                                                                | Refs. |
|-------------------|-------------------|---------|----------------------------|---------------------------------------------|---------|----------------------------------------------------|-------------------------------------------------------------------------------------------------|-------|
| Hautrage          | Hainaut           | Belgium | Hautrage Clays Fm.         | upper lower Barremian-lower upper Barremian | HTpt-4  | Sideritic dark clays                               | Floodplain with very poor development of soil                                                   | 1-6   |
| Uña               | Cuenca            | Spain   | La Huérguina Fm.           | upper Barremian                             | 3       | Coaly laminated clays draping massive sandy layers | Flooding event in a cycle of deltaic progradation-retrogradation in the marginal zone of a lake | 7     |
| Mas de la Parreta | Castellón         | Spain   | Arcillas de Morella Fm.    | uppermost Barremian-lower Albian            | CMP-3   | Red clays                                          | Freshwater swamp or mangrove                                                                    | 8,9   |
| El Soplao         | Cantabria         | Spain   | Las Peñasas Fm.            | lower Albian                                | FA3     | Silty clays                                        | Delta plain                                                                                     | 10,11 |
| San Just          | Teruel            | Spain   | Escucha Fm.                | lower-middle Albian                         | SJpt-1  | Grey-black clays                                   | Freshwater swamp plain subenvironment within an upper deltaic plain                             | 12-15 |
| Reillo            | Cuenca            | Spain   | Arenas de Utrillas Fm.     | upper Albian                                | -       | Red clays                                          | Floodplain                                                                                      | 16    |
| Archingeay        | Charente-Maritime | France  | Charente-Maritime deposits | uppermost Albian                            | A1sl-A  | Clays intersected by fine sandy beds               | Brackish or marine water influenced environment, mangrove                                       | 17    |
|                   |                   |         |                            | lowermost Cenomanian                        | A2sm1-2 | Blue-Grey laminated clays                          | Freshwater or brackish water influenced environment, mangrove                                   | 17,18 |
| La Buzinie        | Charente          | France  | -                          | uppermost lower-lowermost middle Cenomanian | B3/C    | Lignitic clays                                     | Paralic environment                                                                             | 19    |
| Infiesto          | Asturias          | Spain   | Infiesto Fm.               | upper Turonian-Coniacian                    | -       | -                                                  | -                                                                                               | 20    |
| Piolenc           | Vaucluse          | France  | -                          | lower Santonian                             | C       | Sandy clays                                        | Supratidal ponds or marshes                                                                     | 21    |
| Belcodène         | Bouches-du-Rhône  | France  | -                          | upper Santonian                             | -       | Laminated marls                                    | Coastal environment                                                                             | 22    |

### Supplementary Information References

1. Quinif, Y., Méon, H. & Yans, J. Nature and dating of karstic filling in the Hainaut Province (Belgium). Karstic, geodynamic and paleogeographic implications. *Geodin. Acta* 19, 73–85 (2006).
2. Thiry, M. *et al.* Continental France and Belgium during the early Cretaceous: paleoweatherings and paleolandforms. *Bull. Soc. Géol. Fr.* 177, 155–175 (2006).
3. Spagna, P., Dupuis, C. & Yans, J. Sedimentology of the Wealden clays in the Hautrage quarry. *Mem. Geol. Surv. Belg.* 55, 35–44 (2008).
4. Spagna, P., Yans, J. & Schnyder, J. in *Bernissart Dinosaurs and Early Terrestrial Ecosystems* (ed. Godefroit, P.) 464 (Series: Life of the Past. Indiana University Press, Bloomington, USA., 2012).
5. Yans, J. *et al.* Carbon-isotope of fossil wood and dispersed organic matter from the terrestrial Wealden facies of Hautrage (Mons Basin, Belgium). *Palaeogeogr. Palaeoclimatol. Palaeoecol.* 291, 85–105 (2010).
6. Barral, A. *et al.* Local-scale analysis of plant community from the Early Cretaceous riparian ecosystem of Hautrage, Belgium. *Palaeogeogr. Palaeoclimatol. Palaeoecol.* 443, 107–122 (2016).
7. Gomez, B., Martín-Closas, C., Méon, H., Thévenard, F. & Barale, G. Plant taphonomy and palaeoecology in the lacustrine Uña delta (Late Barremian, Iberian Ranges, Spain). *Palaeogeogr. Palaeoclimatol. Palaeoecol.* 170, 133–148 (2001).
8. Gámez, D., Paciotti, P., Colombo Piñol, F., Salas, R. & others. La Formación Arcillas de Morella (Aptiense inferior), Cadena Ibérica oriental (España): caracterización sedimentológica. (2003).
9. Villanueva-Amadoz, U., Santisteban, C. & Santos-Cubedo, A. Age determination of the Arcillas de Morella Formation (Maestrazgo Basin, Spain). *Hist. Biol.* 27, 389–397 (2014).
10. Najarro, M., Peñalver, E., Rosales, I., Daviero-Gomez, V. & others. Unusual concentration of Early Albian arthropod-bearing amber in the Basque-Cantabrian Basin (El Soplao, Cantabria, Northern Spain): palaeoenvironmental and palaeobiological implications. *Geol. Acta Int. Earth Sci. J.* 7, 363–387 (2009).
11. Najarro, M. *et al.* Review of the El Soplao amber outcrop, Early Cretaceous of Cantabria, Spain. *Acta Geol. Sin.-Engl. Ed.* 84, 959–976 (2010).

12. Querol, X., Salas, R., Pardo, G. & Ardevol, L. Albian coal-bearing deposits of the Iberian Range in northeastern Spain. *Geol. Soc. Am. Spec. Pap.* 267, 193–208 (1992).
13. Peñalver, E., Delclòs, X. & Soriano, C. A new rich amber outcrop with palaeobiological inclusions in the Lower Cretaceous of Spain. *Cretac. Res.* 28, 791–802 (2007).
14. Villanueva-Amadoz, U., Pons, D., Diez, J. B., Ferrer, J. & Sender, L. M. Angiosperm pollen grains of San Just site (Escucha Formation) from the Albian of the Iberian Range (north-eastern Spain). *Rev. Palaeobot. Palynol.* 162, 362–381 (2010).
15. Barral, A., Lécuyer, C., Gomez, B., Fourel, F. & Daviero-Gomez, V. Effects of chemical preparation protocols on  $\delta^{13}\text{C}$  values of plant fossil samples. *Palaeogeogr. Palaeoclimatol. Palaeoecol.* 438, 267–276 (2015).
16. Meléndez, M. N. El Cretácico de la región de Cañete-Rincón de Ademuz (provincias de Cuenca y Valencia). (Departamento de Estratigrafía y Geología Histórica, Facultad de Ciencias Geológicas, Universidad Complutense, 1983).
17. Gomez, B. *et al.* Floristic assemblage from the Albian-Cenomanian of Charente-Maritime (SW France). *Ann. Paléontol.* 90, 147–159 (2004).
18. Gomez, B., Coiffard, C., Dépré, É., Daviero-Gomez, V. & Néraudeau, D. Diversity and histology of a plant litter bed from the Cenomanian of Archingeay–Les Nouillers (southwestern France). *Comptes Rendus Palevol* 7, 135–144 (2008).
19. Batten, D. J., Colin, J.-P. & Néraudeau, D. Megaspores from mid Cretaceous deposits in western France and their biostratigraphic and palaeoenvironmental significance. *Rev. Palaeobot. Palynol.* 161, 151–167 (2010).
20. Bernárdez Rodríguez, E. Los dientes de seláceos del Cretácico de la Depresión Central Asturiana. (Departamento de Geología, Universidad de Oviedo, 2002).
21. Gomez, B., Barale, G., Saad, D. & Perrichot, V. Santonian angiosperm-dominated leaf-assemblage from Piolenc (Vaucluse, Sud-Est de la France). *Comptes Rendus Palevol* 2, 197–204 (2003).
22. Saint Martin, S., Saint Martin, J.-P., Girard, V. & Néraudeau, D. Organismes filamenteux de l'ambre du Santonien de Belcodène (Bouches-du-Rhône, France). *Annales de Paléontologie* 99, 339–360 (2013).
